# Supplementary material for: Investigation of interaction between MXene nanosheets and human plasma and protein corona composition
Source: Royal Society of Chemistry journal article supplement (doi:10.1039/d1nr08548d), 2022-01-01
Supplement: d1nr08548d1.pdf [file d1nr08548d1.pdf]

## Supplemental Information

### Investigation of Interaction between MXene Nanosheets and Human Plasma and Protein Corona Composition

*Xuri Wu, Feng Tan\*, Shizhu Cheng, Yangyang Chang, Xiaochun Wang, Lingxin Chen\**

X. R. Wu, F. Tan, S. Z. Cheng, Y. Y. Chang  
Key Laboratory of Industrial Ecology and Environmental Engineering (MOE)  
School of Environmental Science and Technology  
Dalian University of Technology  
Dalian 116024, P. R. China  
E-mail: [tanf@dlut.edu.cn](mailto:tanf@dlut.edu.cn)

X. C. Wang  
Shandong Provincial Key Laboratory of Biochemical Engineering  
College of Marine Science and Biological Engineering  
Qingdao University of Science and Technology  
Qingdao 266042, P. R. China

L. X. Chen  
CAS Key Laboratory of Coastal Environmental Processes and Ecological Remediation  
Yantai Institute of Coastal Zone Research  
Chinese Academy of Sciences  
Yantai 264003, P. R. China  
E-mail: [lxchen@yic.ac.cn](mailto:lxchen@yic.ac.cn)

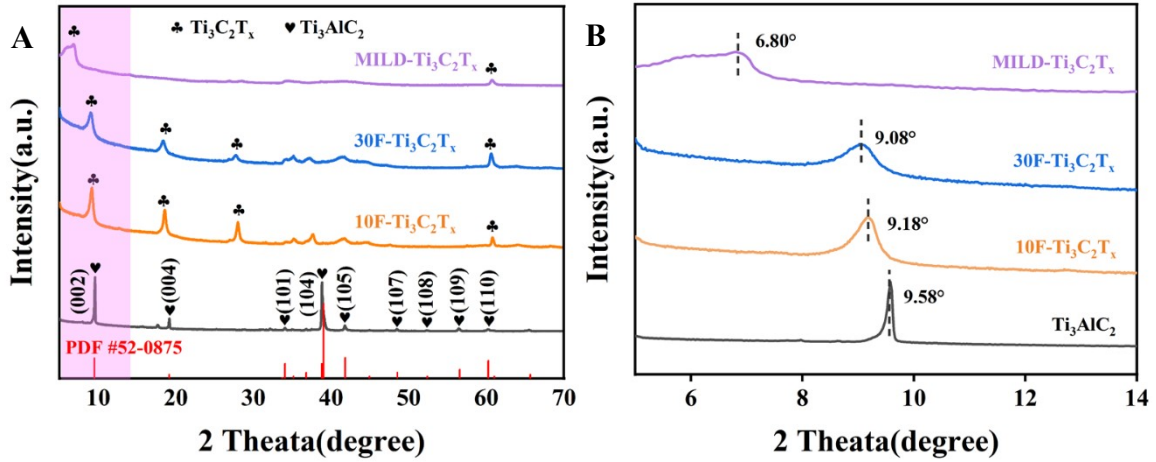

Supplemental Figure 1. XRD patterns of  $Ti_3AlC_2$  and etched productions (A) treated in 10 wt% (10F- $Ti_3C_2T_x$ ), 30 wt% (30F- $Ti_3C_2T_x$ ) concentrated HF solution, and LiF/HCl mixed solution (MILD- $Ti_3C_2T_x$ ); (B) magnification of (0 0 2) peak in (A).

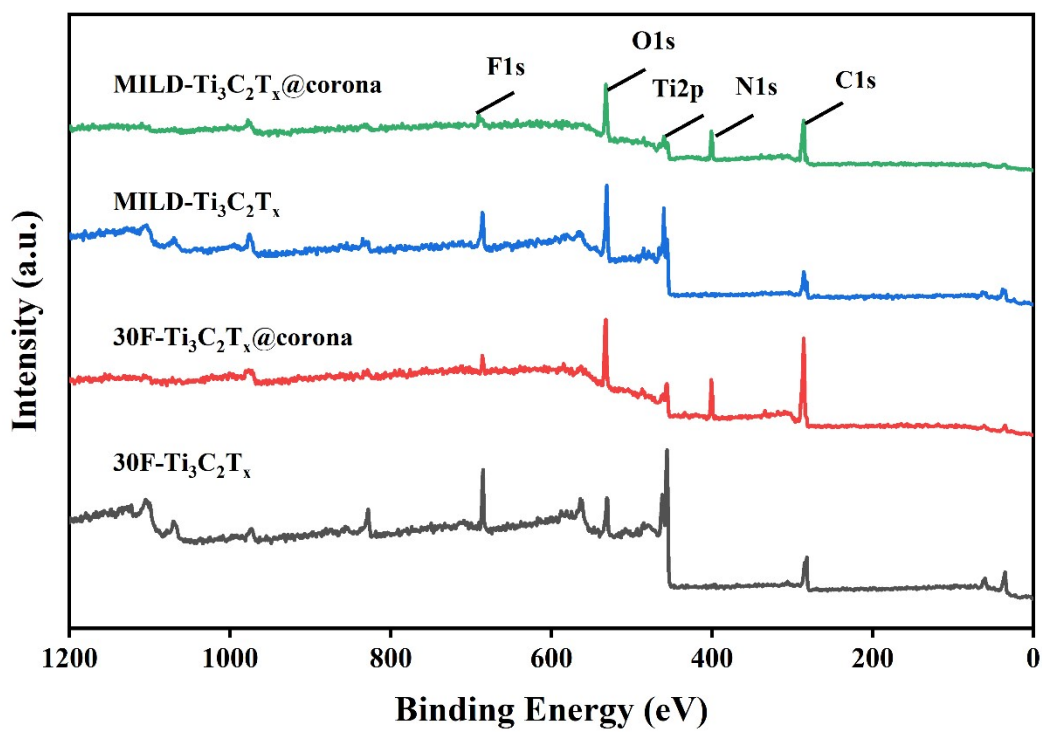

Supplemental Figure 2. XPS survey spectra of all samples including 30F-Ti<sub>3</sub>C<sub>2</sub>T<sub>x</sub> and 30F-Ti<sub>3</sub>C<sub>2</sub>T<sub>x</sub>@corona, MILD-Ti<sub>3</sub>C<sub>2</sub>T<sub>x</sub>, and MILD-Ti<sub>3</sub>C<sub>2</sub>T<sub>x</sub>@corona.

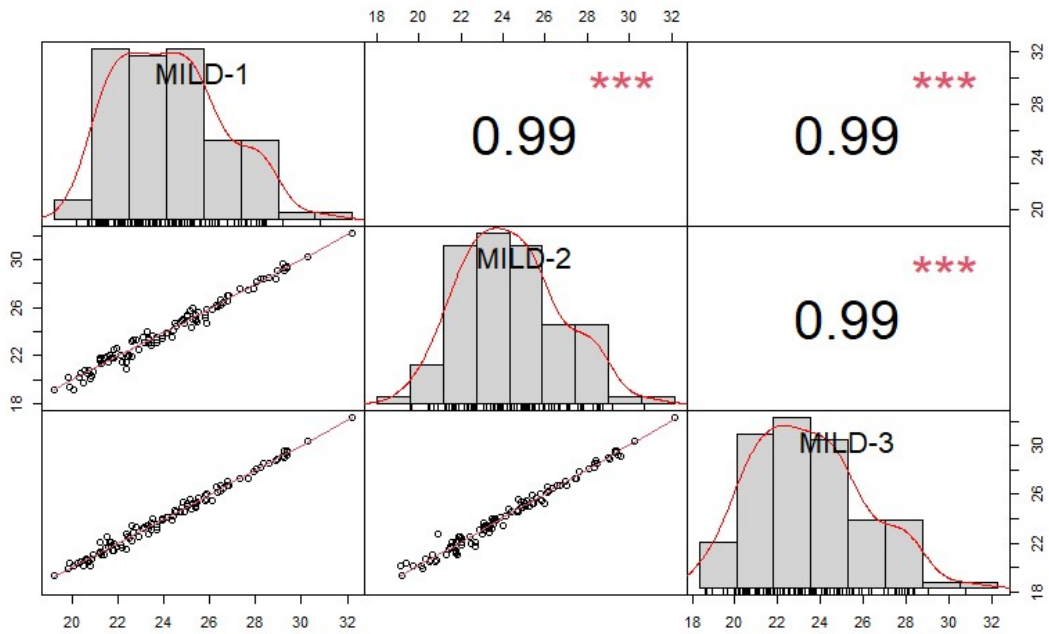

Supplemental Figure 3. Correlation matrix diagram in three repetitions of sample loading. Excellent correlations were shown, indicating the excellent performance and reproducibility of the mass spectrum.

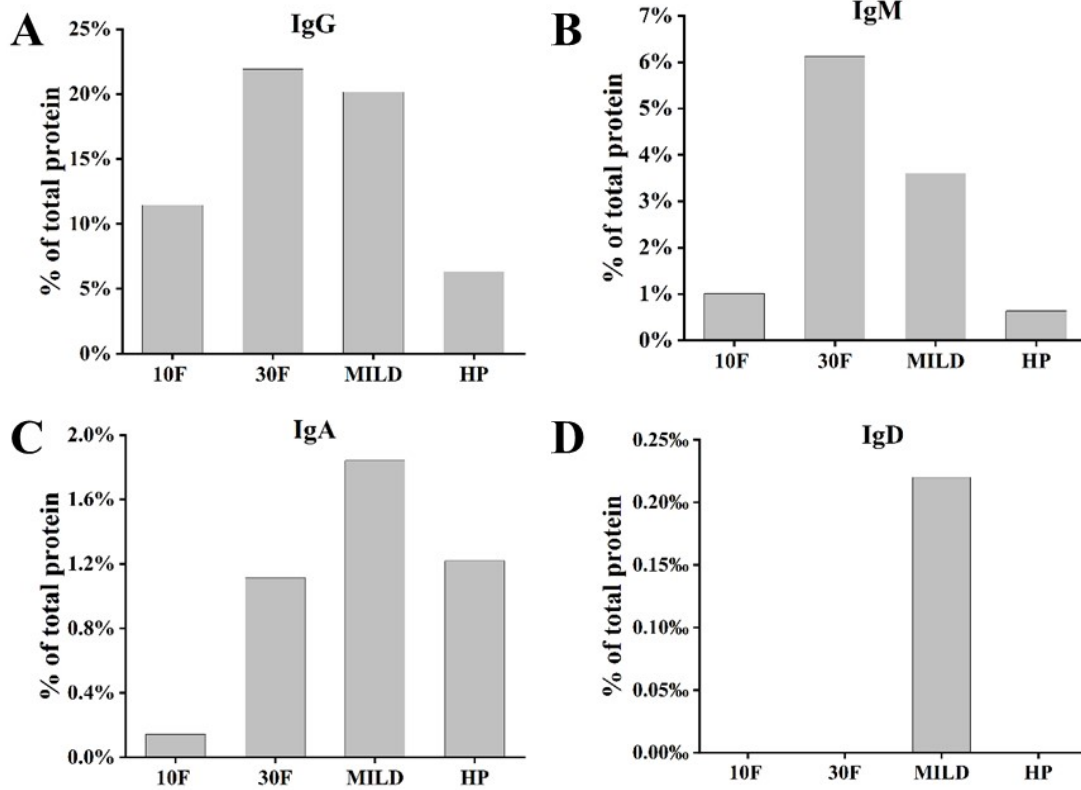

Supplemental Figure 4. Relative abundance of four immunoglobulins including IgG (A), IgM (B), IgA (C) and IgD (D) in the MXene-coronas.

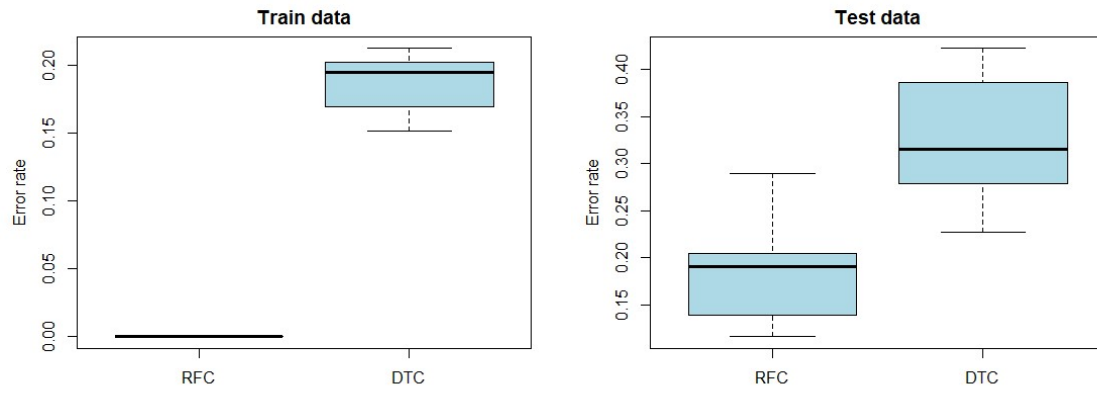

Supplemental Figure 5. Error rates of DTC and RFC models based on the train data (left) and the test data (right).

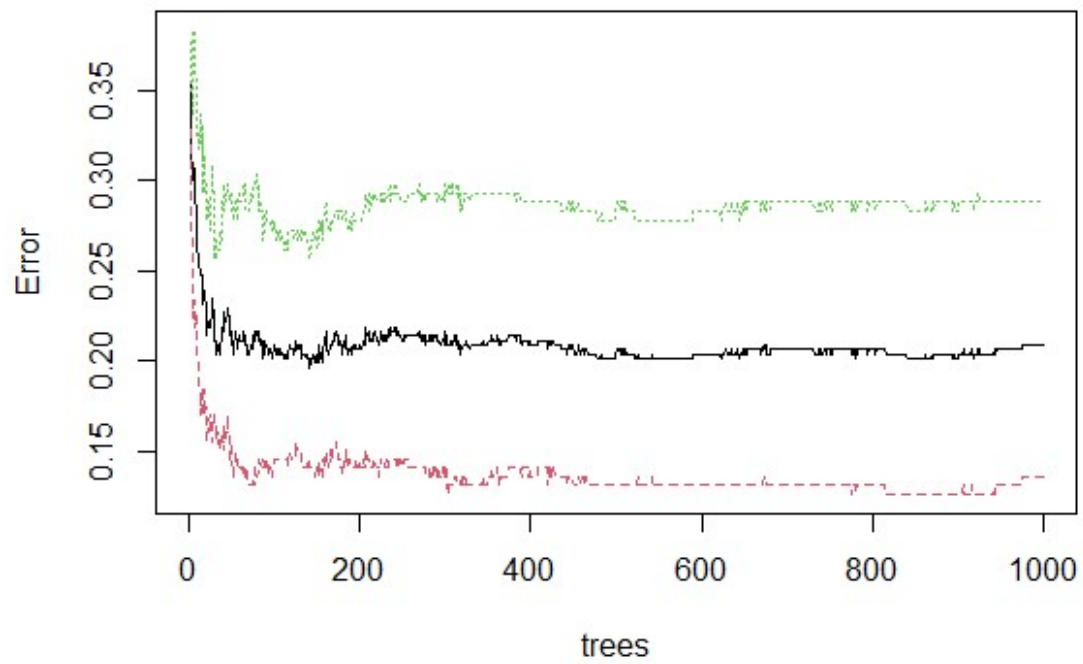

Supplemental Figure 6. Optimization of the parameter ntree. The ntree was selected to 500 in the final model.

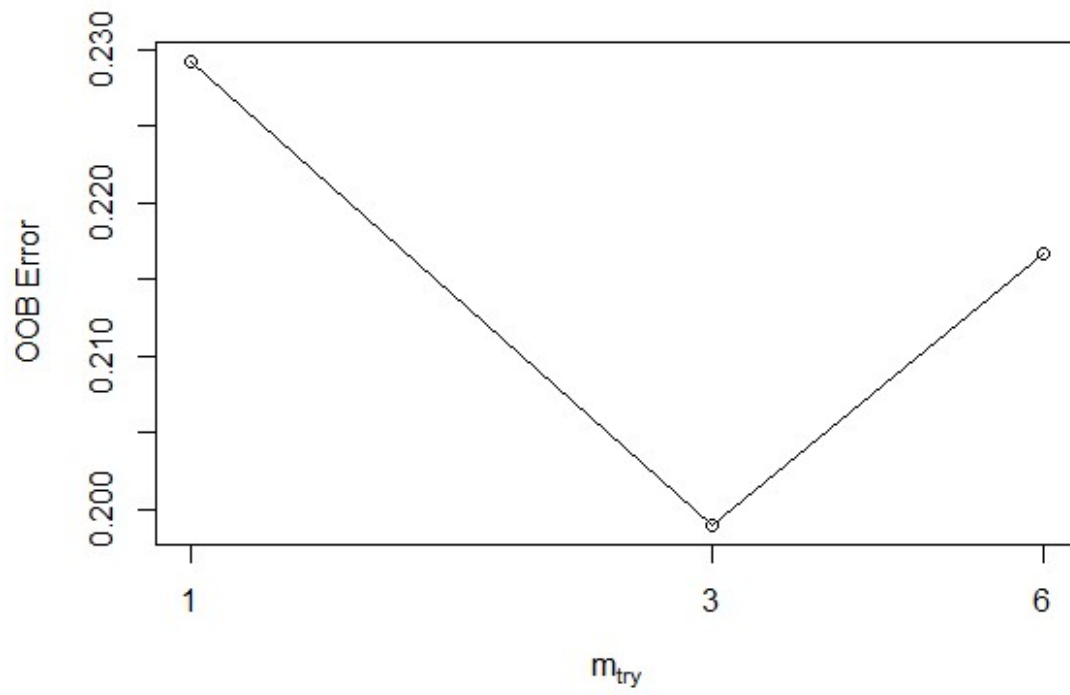

Supplemental Figure 7. Optimization of the parameter  $m_{try}$ . The  $m_{try}$  was selected to 3 in the final model.



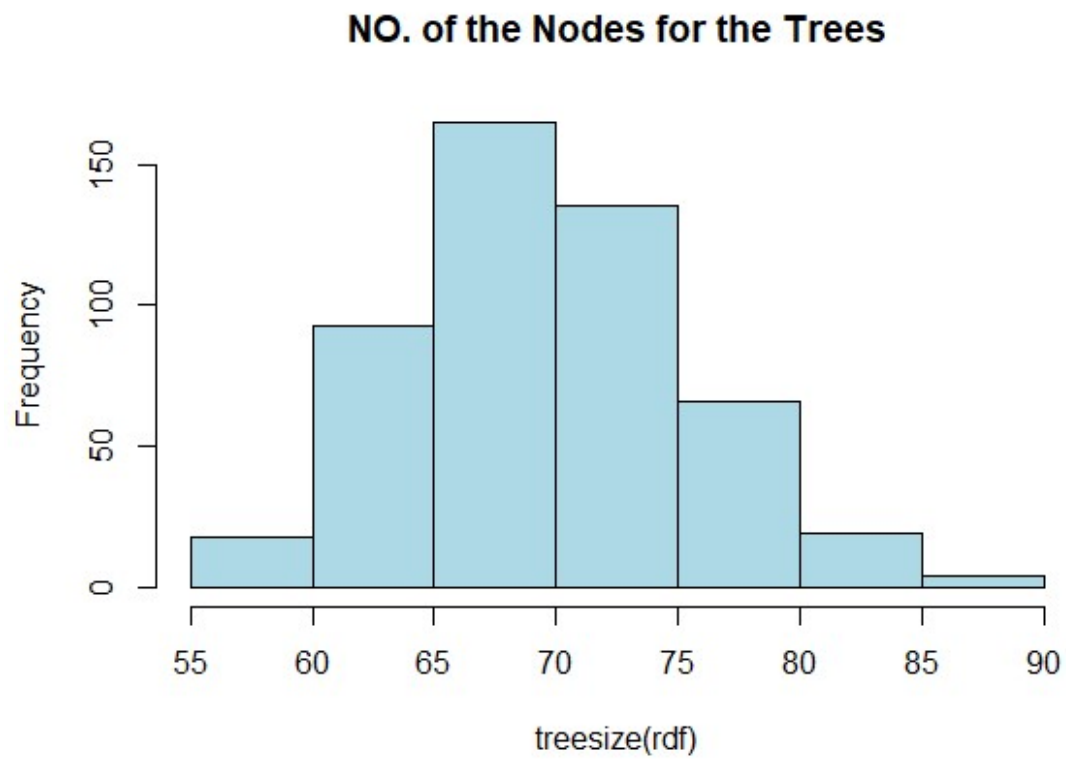

Supplemental Figure 8. The size distribution of decision trees in the trained RFC.

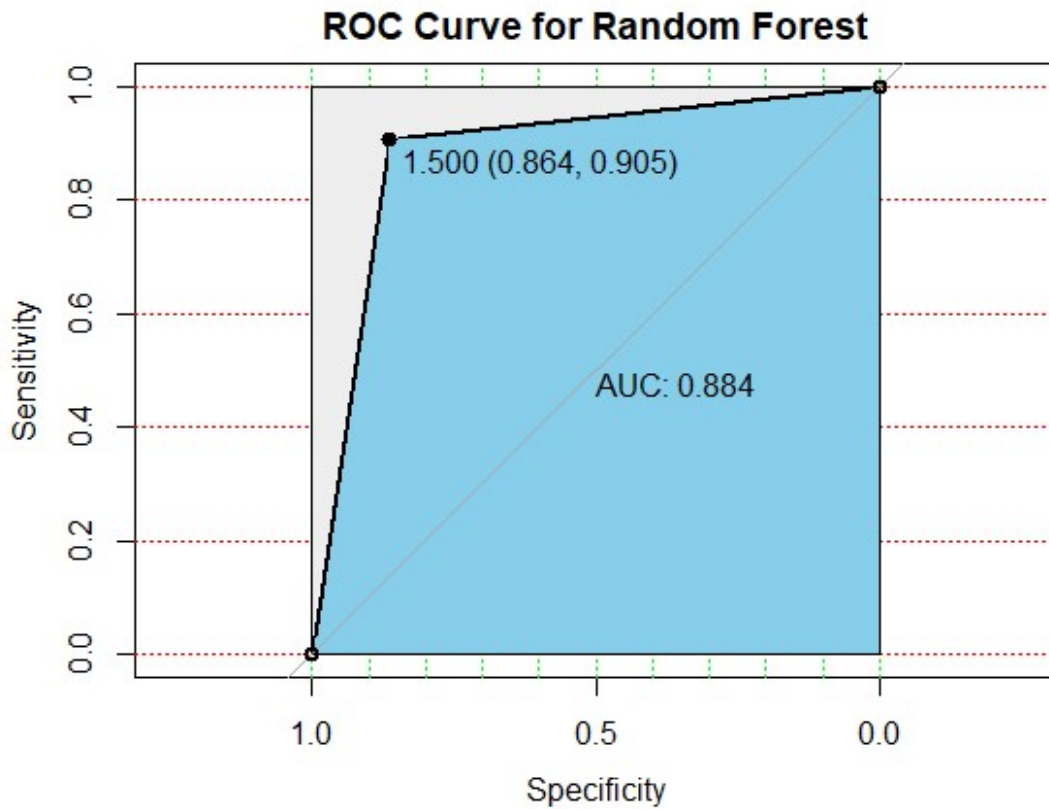

Supplemental Figure 9. ROC curve for random forest included in the final model. The area under the receiver operating curve (AUC) of the model is generally considered to be an indicator of the predictive power of model. With an AUC of 0.88, indicating the model performance is excellent.

Supplemental Table 1. Elemental composition on microparticles surface before and after immersion in HP by XPS.

| Samples                                                      | Atomic (%) |       |      |       |       |       |
|--------------------------------------------------------------|------------|-------|------|-------|-------|-------|
|                                                              | Ti         | C     | Al   | F     | O     | N     |
| 30F-Ti <sub>3</sub> C <sub>2</sub> T <sub>x</sub>            | 27.52      | 32.43 | 0.93 | 14.63 | 24.50 | --    |
| MILD-Ti <sub>3</sub> C <sub>2</sub> T <sub>x</sub>           | 21.87      | 32.38 | 2.26 | 14.46 | 29.03 | --    |
| 30F-Ti <sub>3</sub> C <sub>2</sub> T <sub>x</sub> @corona    | 5.31       | 59.46 | 0.43 | 4.02  | 19.14 | 11.64 |
| MILD- Ti <sub>3</sub> C <sub>2</sub> T <sub>x</sub> @ corona | 6.70       | 50.75 | 0.57 | 6.59  | 22.07 | 13.33 |

Supplemental Table 2. Original data for the DLS characterization and zeta potential characterization corresponding to Table 1. Values are from six-nine independent experiments. Test in 0.02 M pH 7.4 PBS buffer at 25°C.

| Samples                                                    | Size (nm)                         | Zeta potential                    |
|------------------------------------------------------------|-----------------------------------|-----------------------------------|
| 10F-Ti <sub>3</sub> C <sub>2</sub> T <sub>x</sub>          | 438.8; 508.3; 452.8; 456.5        | -22.3; -25.8; -24.0; -27.0        |
|                                                            | 420.3; 517.8; 435.4; 440.3; 467.4 | -29.2; -32.5; -33.3; -32.5        |
| 30F-Ti <sub>3</sub> C <sub>2</sub> T <sub>x</sub>          | 761.7; 823.8; 728.7; 912.3        | -17.7; -18.6; -20.5; -22.1        |
|                                                            | 739.8; 834.1; 664.1; 860.6        | -23.7; -23.0; -20.9; -22.4; -24.2 |
| MILD-Ti <sub>3</sub> C <sub>2</sub> T <sub>x</sub>         | 644.6; 740.6; 676.1               | -25.3; -27.0; -29.9; -29.5        |
|                                                            | 725.1; 789.7; 759.4; 887.4        | -31.1; -32.0; -30.7; -29.0        |
| 10F-Ti <sub>3</sub> C <sub>2</sub> T <sub>x</sub> @corona  | 1766; 928.9; 1219                 | -7.3; -7.6; -8.8; -10.3           |
|                                                            | 894.8; 1059; 1325                 | -11.2; -11.2; -12.5; -13.8; -13.5 |
| 30F-Ti <sub>3</sub> C <sub>2</sub> T <sub>x</sub> @corona  | 2272; 1209; 1419                  | -10.5; -10.7; -12.0; -12.5        |
|                                                            | 2062; 1610; 1526; 1320            | -13.4; -14.0; -14.5; -15.0; -15.3 |
| MILD-Ti <sub>3</sub> C <sub>2</sub> T <sub>x</sub> @corona | 2773; 2306; 2392; 2673            | -9.1; -9.6; -11.4; -12.5          |
|                                                            | 2046; 2435; 2296; 1357; 2500      | -14.1; -13.4; -15.0; -14.2; -15.8 |
